# Supplementary material for: System design of large-area vertical photothermoelectric detectors based on carbon nanotube forests with MXene electrodes
Source: Royal Society of Chemistry journal article supplement (doi:10.1039/d2na00895e), 2023-01-01
Supplement: d2na00895e1.pdf [file d2na00895e1.pdf]

## Supporting information

### **System design of large-area vertical photothermoelectric detector based on carbon nanotube forest with MXene electrodes**

Jiaqi Wang<sup>1</sup>, Zhemiao Xie<sup>1</sup>, Jiayu Alexander Liu<sup>1</sup>, Rui Zhou<sup>1</sup>, Guanxuan Lu<sup>1</sup>, John T.W. Yeow<sup>1</sup>

1. Advanced Micro-/Nano- Devices Lab, Department of Systems Design Engineering, University of Waterloo, 200 University Ave West, Waterloo, Ontario, N2L 3G1, Canada

Corresponding Author: John T.W. Yeow

E-mail: [jyeow@uwaterloo.ca](mailto:jyeow@uwaterloo.ca)

Phone: +1-519-888-4567, ext. 32152

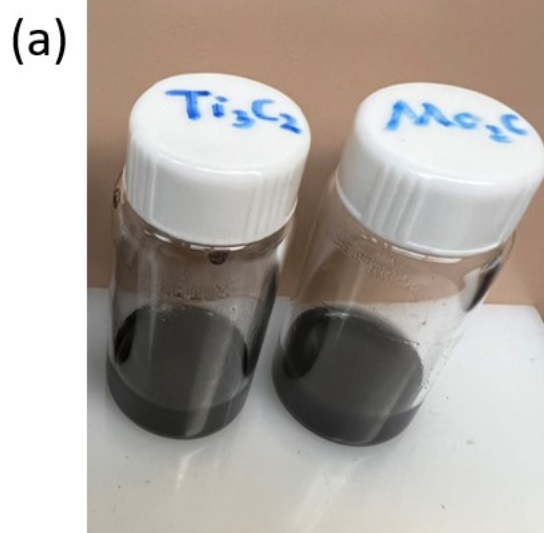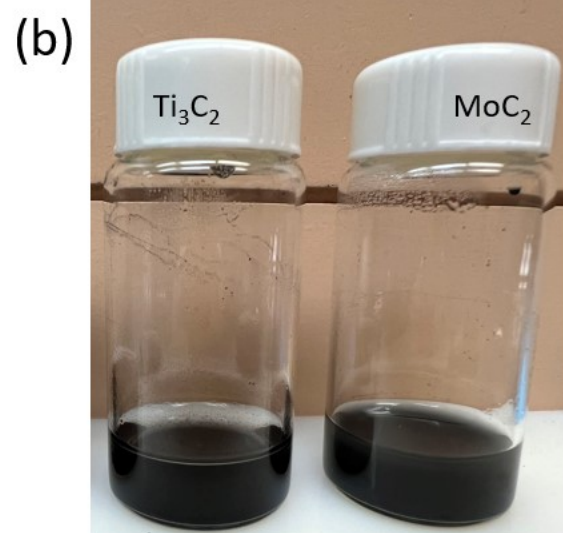

**Fig. S1.** The photographic image of the prepared MXene solution.

**Fig. S2.** The illustration of temperature measurement by infrared thermometer. With the blackbody radiation vertically illuminates on the top of the PTE detector, infrared thermometer #1 and #2 measures the temperature of top MXene electrode and bottom Si substrate.

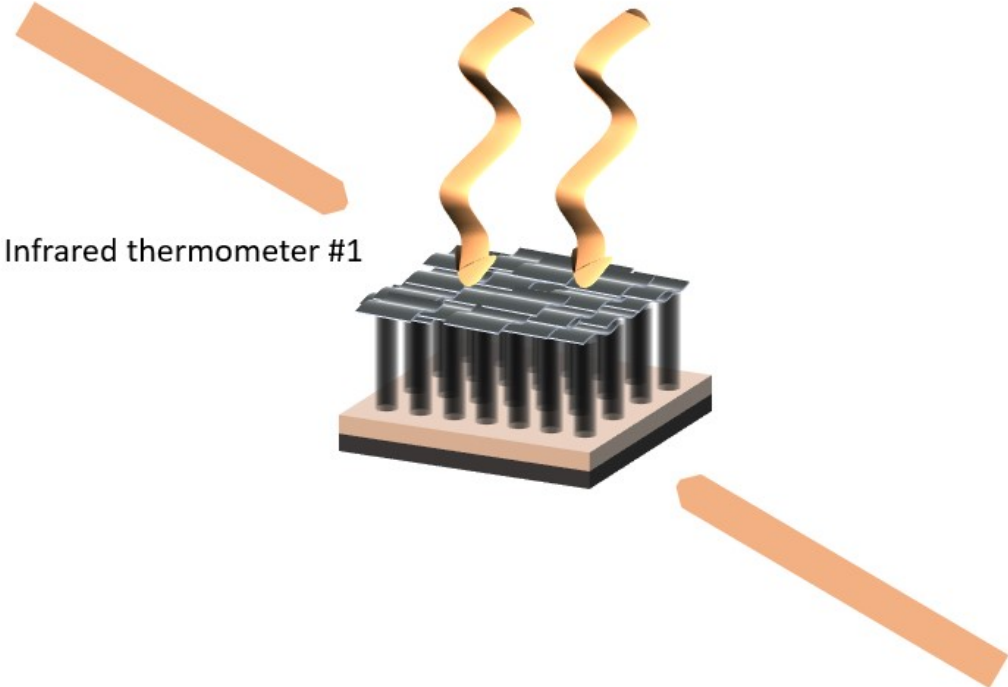

In this measurement, we use the PTE detector with  $\text{Ti}_3\text{C}_2$  electrode of 0.9  $\mu\text{m}$ . With the 873K blackbody radiation, the temperature of top MXene electrode and bottom Si substrate is 29.6  $^\circ\text{C}$  and 22.5  $^\circ\text{C}$ . The ambient temperature is 22.5  $^\circ\text{C}$ . The temperature difference is 7.1  $^\circ\text{C}$ . According to the PTE voltage calculation equation,  $V_{PTE} = S_{eff}\Delta T$ , where  $S_{eff}$  the effective Seebeck coefficient of the detector and  $\Delta T$  is the temperature difference of two electrodes. The estimated  $S_{eff}$  should be 33.8  $\mu\text{V}/\text{K}$ .

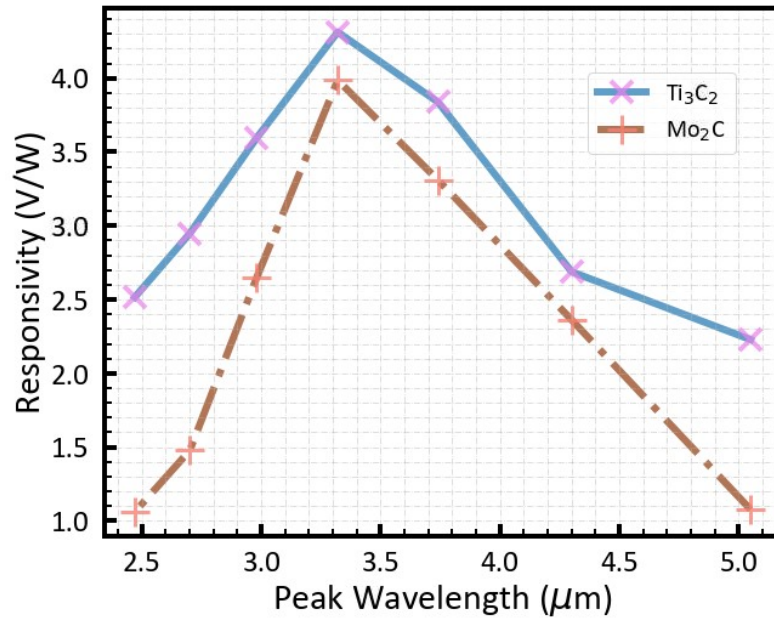

**Fig. S3.** The relationship between responsivity and blackbody peak wavelength.

**Table S1.** Performance Comparison of PTE detectors.

| Detection Spectrum | Active layer            | Electrodes  | Response time | Detectivity ( $\times 10^8$ Jones) | Ref.      |
|--------------------|-------------------------|-------------|---------------|------------------------------------|-----------|
| MIR                | CNTF                    | MXene/Metal | 2.3 s         | 2.2                                | This work |
| MIR                | Graphene/PEDOT:PSS      | Metal/Metal | >10 s         | 0.14                               | 1         |
| MIR                | Graphene/polyaniline    | Metal/Metal | >5 s          | 0.68                               | 2         |
| MIR                | CNT/(Polyvinyl alcohol) | Metal/Metal | /             | 0.049                              | 3         |
| Terahertz (THz)    | CNT                     | Metal/Metal | /             | 1.2                                | 4         |
| THz                | EuBiTe <sub>3</sub>     | Metal/Metal | 0.1 s         | 2.3                                | 5         |

## References

- (1) Zhang, M.; Yeow, J. T. W. A Flexible, Scalable, and Self-Powered Mid-Infrared Detector Based on Transparent PEDOT: PSS/Graphene Composite. *Carbon N. Y.* **2020**, *156*, 339–345.
- (2) Xie, Z.; Wang, J.; Yeow, J. T. W. Doped Polyaniline/Graphene Composites for Photothermoelectric Detectors. *ACS Appl. Nano Mater.* **2022**.
- (3) Zhang, M.; Yeow, J. T. W. Flexible Polymer - Carbon Nanotube Composite with High Response Stability for Wearable Thermal Imaging. *ACS Appl. Mater. Interfaces* **2018**, *10*, 26604–26609.
- (4) Suzuki, D.; Oda, S.; Kawano, Y. A Flexible and Wearable Terahertz Scanner. *Nat. Photonics* **2016**, *10*, 809–813.
- (5) Niu, Y.; Wang, Y.; Wu, W.; Wen, J.; Cheng, Y.; Chen, M.; Jiang, S.; Wu, D.; Zhao, Z. Efficient Room-Temperature Terahertz Detection via Bolometric and Photothermoelectric Effects in EuBiTe<sub>3</sub> Crystal. *Opt. Mater. Express* **2020**, *10*, 952.
